# Supplementary material for: Development of the SPARK family member web pages to improve symptom management for pediatric patients receiving cancer treatments
Source: Springer Nature journal article supplement (doi:10.1186/s12885-020-07433-9), 2020-09-25
Supplement: MOESM1 [file 18417566]

SPARK Landing Page

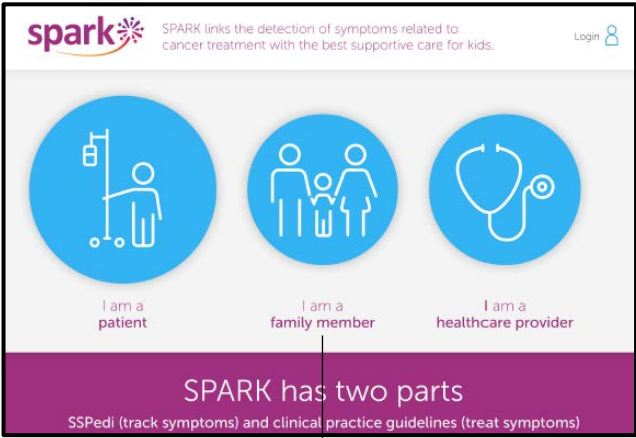

Single SSPedi Administration Report

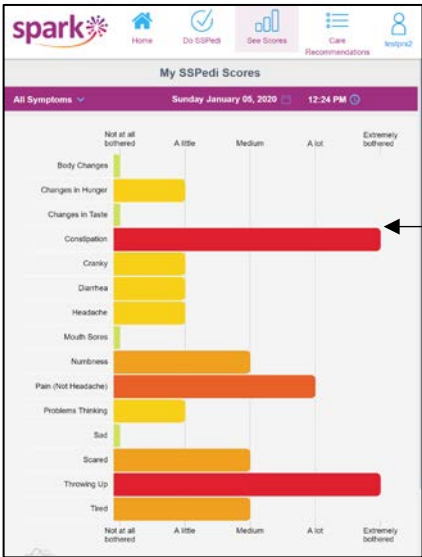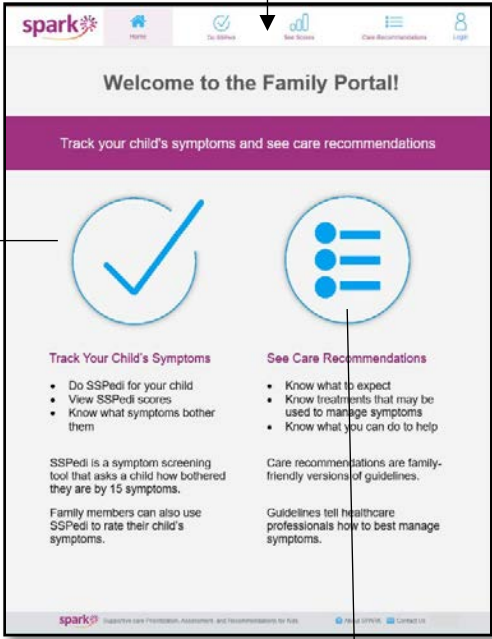

SPARK Family Member Home Page

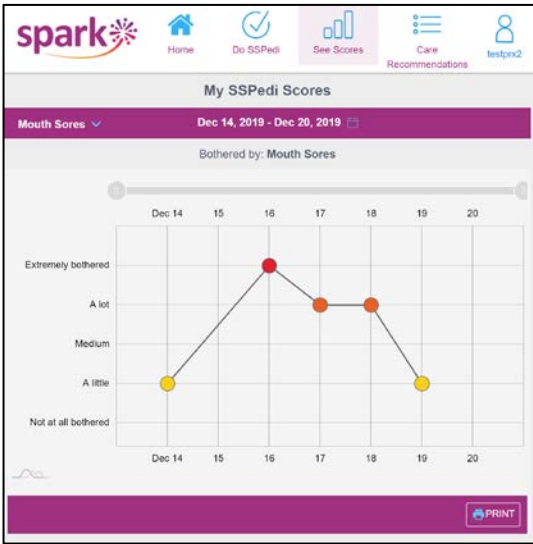

Specific Symptom Longitudinal Report

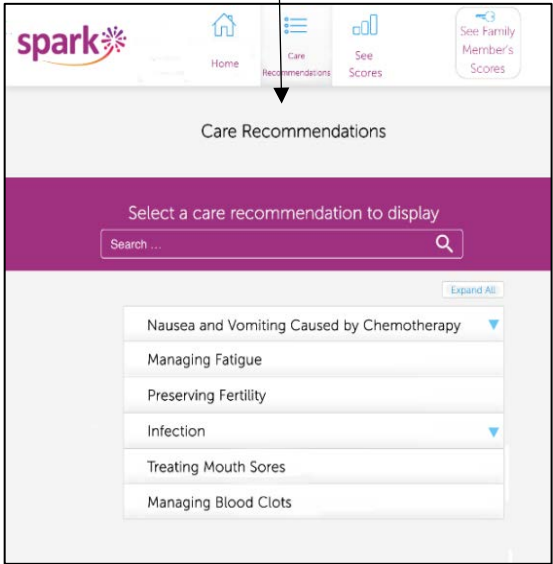

Care Recommendations Landing Page
